# Supplementary material for: RGD functionalized chitosan nanoparticle mediated targeted delivery of raloxifene selectively suppresses angiogenesis and tumor growth in breast cancer
Source: Royal Society of Chemistry journal article supplement (doi:10.1039/c9nr10673a), 2020-01-01
Supplement: c9nr10673a2.pdf [file c9nr10673a2.pdf]

**Table S1. Average size, zeta potential and encapsulation efficiency of raloxifene loaded CHNP and RGD-CHNP**

| <b>Sample</b>       | <b>Size (nm)</b> | <b>PDI</b>   | <b>Zeta Potential (mV)</b> | <b>Encapsulation efficiency (%)</b> |
|---------------------|------------------|--------------|----------------------------|-------------------------------------|
| <b>CHNP</b>         | 93.5 ± 8         | 0.236 ± .05  | 25 ± 1.5                   | -                                   |
| <b>RGD-CHNP</b>     | 128 ± 9.5        | 0.290 ± .07  | 36.74 ± 1.1                | -                                   |
| <b>Rlx-CHNP</b>     | 154 ± 7          | 0.256 ± 0.07 | 24 ± 2.3                   | 47.5 ± 5                            |
| <b>Rlx-RGD-CHNP</b> | 188 ± 22         | 0.265 ± 0.05 | 31.84 ± 2.8                | 47 ± 3                              |
